# Supplementary material for: Virome profiling of long-tailed marmots reveals tissue tropism and cross-species transmission of a diversity of uncharacterized mammalian viruses
Source: Research Square preprint supplement (doi:10.21203/rs.3.rs-6670597/v1), 2025-06-20
Supplement: Supplementary file 1 [file 8a104c9f5aa76d8ff99d06b6.docx]

| (sample number)  Location | Tissue | McCoV XJ72F | McCoV XJ87F | RVA XJ1 | McEFV XJ82F | McAdV XJ96C | McHV XJ16L | Circo-like virus XJ21C | Circo-like virus XJ24C | McPyV XJ7L | McPaV XJ32L | McTTV XJ1 | McAbuV XJ15C |
| --- | --- | --- | --- | --- | --- | --- | --- | --- | --- | --- | --- | --- | --- |
| KT (14) | Int. | - | - | - | - | 1 | 1 | - | - | 3 | - | - | - |
|  | Lun. | - | - | 1 | - | - | - | - | - | 2 | - | - | - |
|  | Lym. | - | - | 1 | - | - | - | - | - | - | - | - | - |
|  | Kid. | - | - | - | - | - | - | - | - | 3 | - | - | - |
| WM (16) | Int. | - | - | - | - | - | - | 1 | - | 5 | - | - | - |
|  | Lun. | - | - | - | - | - | - | - | - | 8 | - | - | - |
|  | Lym. | - | - | - | - | - | 4 | - | - | 3 | - | - | - |
|  | Kid. | - | - | - | - | - | - | - | - | - | - | - | - |
| HQ (26) | Int. | - | - | - | - | 1 | - | 3 | 6 | 2 | 1 | - | 1 |
|  | Lun. | 1 | 1 | 1 | 1 | - | - | - | - | - | - | - | - |
|  | Lym. | - | - | - | - | - | - | - | - | - | - | - | - |
|  | Kid. | - | - | 1 | - | - | - | - | - | - | - | - | - |
| KD (31) | Int. | - | - | - | - | - | - | 15 | - | 1 | 3 | - | - |
|  | Lun. | - | - | - | - | - | - | - | - | - | - | - | - |
|  | Lym. | - | - | - | - | - | 4 | - | - | 1 | 2 | - | - |
|  | Kid. | - | - | - | - | - | - | - | - | 1 | - | - | - |
| MZ (14) | Int. | - | - | - | - | 1 | - | 4 | - | - | - | - | 1 |
|  | Lun. | - | - | - | - | - | - | - | - | - | - | 1 | - |
|  | Lym. | - | - | - | - | - | 1 | - | - | - | - | - | - |
|  | Kid. | - | - | - | - | - | - | - | - | - | - | - | - |
