# Supplementary material for: Virome profiling of long-tailed marmots reveals tissue tropism and cross-species transmission of a diversity of uncharacterized mammalian viruses
Source: Research Square preprint supplement (doi:10.21203/rs.3.rs-6670597/v1), 2025-06-20
Supplement: Supplementary file 2 [file b3a3d6c9f227b883450025ed.xlsx]

## Sheet: Sheet1
	Table S3: Comparison of amino acid homology in five demarcated domains between MCCoV-XJ87, MCCoV-XJ72, and the current coronaviruses in GenBank.
	MCCoV-XJ87F	Numbers of amino acids	Amino acid identity (%)	MCCoV-XJ72F	Numbers of amino acids	Amino acid identity (%)
	NSP5 (3CLpro)	304	72.7	NSP5 (3CLpro)	304	71.38
	NSP12 (NiRAN，RdRp)	926	77.05	NSP12 (NiRAN，RdRp)	925	76.63
	NSP13 (HEL1，ZBD)	599	75.29	NSP13 (HEL1，ZBD)	599	75.59
