# Supplementary material for: Virome profiling of long-tailed marmots reveals tissue tropism and cross-species transmission of a diversity of uncharacterized mammalian viruses
Source: Research Square preprint supplement (doi:10.21203/rs.3.rs-6670597/v1), 2025-06-20
Supplement: Supplementary file 3 [file dc9c9c22771177c831530c48.xlsx]

## Sheet: Sheet1
Table S2: Comparison of the MCCoV-XJ87 genome with other representative betacoronavirus strains.
Betacoronavirus	Subgenus	Genome feature		MCCoV-XJ87F Amino acid identity (%)
		Size (bp)	G+Ccontent (%)	nsp5	nsp12	nsp13	S	E	M	N
MCCoV-XJ72F		27431	34.98	88.16	90.17	91.32	75.51	75	88.84	83.74
HCoV-HKU1	Embecovirus	29926	32.06	69.08	75.22	72.45	41.75	34.15	53.33	44.27
HCoV-OC43	Embecovirus	30738	36.69	72.37	75.11	72.8	42.12	32.94	57.58	45.2
RabbitCoV-HKU14	Embecovirus	31100	37.64	67.49	75	72.33	42.12	34.44	58.01	45.85
MHV-1	Embecovirus	31386	41.88	70.39	76.72	74.5	41.16	32.95	58.33	46.19
RCoV	Embecovirus	31250	41.26	71.38	74.34	74.5	41.18	31.82	57.46	45.75
SARS-CoV	Sarbecovirus	29757	40.8	51.79	64.5	62.77	26.66	14.81	39.38	26.17
SARS-CoV-2	Sarbecovirus	29903	37.97	53.09	64.91	63.39	26.87	16.05	38.94	26.01
MERS-CoV	Merbecovirus	30119	41.18	46.79	63.91	65.06	24.32	14.63	38.05	26.55
Ty-BatCoV HKU4	Merbecovirus	30286	37.82	48.37	66.85	65.39	24.38	17.07	37.78	27.41
Ro-BatCoV HKU9	Nobecovirus	29114	41.05	50.65	63.91	64.73	25.34	15.85	39.56	26.79
Ro-BatCoV	Nobecovirus	30161	45.4	48.69	65.42	65.17	25.25	23.52	35.11	24.7
Bat Hp-betacoronavirus	Hibecovirus	31491	41.28	48.69	65.63	65.67	24.57	18.29	34.67	25.36
